## RESEARCH ARTICLE

# Gestation alters the gut microbiota of an oviparous lizard

Brian K. Trevelline<sup>1,\*†</sup>, Kirsty J. MacLeod<sup>2,3,‡</sup>, Tracy Langkilde<sup>2,§</sup> and Kevin D. Kohl<sup>1</sup>

<sup>1</sup>Department of Biological Sciences, University of Pittsburgh, Pittsburgh, PA, 15260, USA, <sup>2</sup>Department of Biology, The Pennsylvania State University, University Park, PA, 16801, USA and <sup>3</sup>Department of Ecosystem Science and Management, The Pennsylvania State University, University Park, PA, 16801, USA

\*Corresponding author: Department of Biological Sciences, University of Pittsburgh, Pittsburgh, PA, 15260, USA; E-mail: [brian.trevelline@gmail.com](mailto:brian.trevelline@gmail.com)

**One sentence summary:** Like mammals, gestation alters the gut microbiota of an oviparous lizard, suggesting that the restructuring of microbial communities during reproduction may be an evolutionarily conserved phenomenon across vertebrate reproductive strategies.

Editor: Julian Marchesi

<sup>†</sup>Brian K. Trevelline, <http://orcid.org/0000-0002-4514-0467>

<sup>‡</sup>Kirsty J. MacLeod, <http://orcid.org/0000-0003-4901-3809>

<sup>§</sup>Tracy Langkilde, <http://orcid.org/0000-0001-7014-2432>

## ABSTRACT

Mammalian pregnancy can alter the diversity, membership and structure of the maternal gut microbiota, but it is unclear whether this phenomenon occurs in vertebrates with different reproductive strategies. We conducted 16S rRNA bacterial inventories to investigate whether oviparous lizards exhibit shifts in gut microbiota similar to those observed in mammals. Using wild-caught eastern fence lizards from Alabama, USA, we collected and extracted fecal DNA from gravid and non-gravid individuals over 54 days in captivity. We predicted that, like mammals, the alpha diversity of lizard gut microbiota would decrease over gestation, and that inter-individual variation in community composition would increase. Indeed, we found that individuals in late-gestation harbored lower gut bacterial richness compared to non-gravid females. Lizard gut microbial communities of late-gestational females exhibited higher pairwise distances for both community membership and community structure compared to earlier gestation stages, indicating a higher degree of inter-individual variation as gestation progressed. Additionally, we found that the relative abundance and prevalence of the candidate phylum Melainabacteria tended to decrease over the course of gestation. While the consequences of these specific alterations are unknown, our results suggest that a general restructuring of gut microbial communities over gestation may be widespread across vertebrate reproductive strategies.

**Keywords:** gestation; lizards; microbiome; oviparous

## INTRODUCTION

The vertebrate gut harbors a rich and dense microbial community that can provide numerous benefits to the host (Kohl and Carey 2016; McFall-Ngai et al. 2013). The composition, and likely function, of these microbial communities often shift in response to major ecological and physiological challenges.

Thus, it is thought that the gut microbiota may have influenced host fitness throughout vertebrate evolution (Bäckhed et al. 2005). Therefore, characterizing how the diversity and functions of gut microbial communities change in response to various challenges is important for our understanding of host-microbe interactions, and investigating these changes in phylogenetically distant hosts will uncover the potential

Received: 30 November 2018; Accepted: 10 June 2019

© FEMS 2019. All rights reserved. For permissions, please e-mail: [journals.permissions@oup.com](mailto:journals.permissions@oup.com)

roles and/or potential consequences of such interactions in an evolutionary context.

One physiological state likely to result in alterations to the gut microbiota is pregnancy. For example, humans harbor gut bacterial communities that are generally unique to individuals, but pregnancy has been shown increase these differences, resulting in greater inter-individual variation in the late stages of gestation (Koren et al. 2012). Moreover, women in their third trimester typically exhibit lower gut microbial richness and increased relative abundance of Actinobacteria and Proteobacteria compared to samples collected during early pregnancy (Koren et al. 2012). A restructuring of gut microbial communities and loss of alpha diversity during pregnancy has also been observed in laboratory mice (Elderman et al. 2018). It is thought that these changes in gut microbial communities may aid in reproductive function in the late stages of gestation. For example, shifts in community structure can result in functional changes in the host, such that germ-free mice inoculated with the gut microbiota of women in late-pregnancy exhibit increased adiposity and insulin insensitivity when compared to mice receiving gut microbiota from women in early-pregnancy (Koren et al. 2012). Further studies have shown that maternal colonization of germ-free mice during pregnancy can alter the innate immune system and intestinal gene expression of the developing fetus (de Agüero et al. 2016), suggesting that changes in the microbiome during gestation could affect the incipient microbial communities of offspring (Funkhouser and Bordenstein 2013; Perez-Muñoz et al. 2017). While the underlying mechanisms driving reduced bacterial richness and greater inter-individual variation in gut microbial communities have yet to be clarified, it has been speculated that the immune system or hormonal changes over pregnancy may be involved (Koren et al. 2012; Nuriel-Ohayon, Neuman and Koren 2016; Elderman et al. 2018).

To date, changes in gut microbiota over gestation have largely been investigated in placental mammals. These studies are limited to humans (Collado et al. 2008; Koren et al. 2012; Nuriel-Ohayon, Neuman and Koren 2016), specific strains of laboratory mice (Elderman et al. 2018) and general changes between actively reproducing and non-reproducing individuals (Phillips et al. 2012; Mallott and Amato 2018). Because vertebrates exhibit a variety of reproductive strategies, such as oviparity (egg laying) or ovoviviparity (internal retention of eggs followed by 'live' birth of offspring), this mammal-focused view limits our understanding of whether gut microbiota might exhibit similar changes in community structure over gestation in animals with different reproductive strategies, such as oviparous lizards.

Numerous physiological mechanisms and consequences of reproduction are shared across vertebrate lineages, and between humans and lizards. For example, the human immune system undergoes substantial restructuring during pregnancy, with a suppression of adaptive immune system and activation of the innate immune system (Sacks, Sargent and Redman 1999; Nuriel-Ohayon, Neuman and Koren 2016). Similarly, studies in lizards have shown decreases in immune function during reproductive periods (French and Moore 2008; Ruiz et al. 2011). Further, both humans (Lof et al. 2005) and lizards (Angilletta and Sears 2000) have higher metabolic needs during reproduction, which may result in greater food intake. Given these similarities across evolutionarily distant hosts, we predicted that gestating lizards may also exhibit reduced richness and greater inter-individual variation of gut microbiota.

Here, we investigated whether gestation alters the gut microbiota of the eastern fence lizard (*Sceloporus undulatus*). Using

wild-caught individuals maintained in captivity, we collected multiple fecal samples from both gravid and non-gravid females, and back-calculated the days before laying for fecal samples from gravid females. Using DNA extracted from lizard fecal material, we conducted bacterial inventories by sequencing the 16S rRNA gene to investigate shifts in the gut microbiota over the course of gestation. As noted above, oviparous lizards exhibit numerous physiological changes during reproduction that are shared across vertebrate lineages, thus we predicted that the gut microbiota of gravid lizards should exhibit qualitatively similar changes over gestation to those that have been previously documented during human pregnancy. Specifically, we predicted that the alpha diversity of the lizard gut microbiota would decrease over gestation, and that inter-individual variation in microbial community composition would increase. Such findings would suggest there may be conserved physiological interactions between the host and gut microbiota during reproduction across vertebrate lineages.

## MATERIALS AND METHODS

### Lizard capture and housing

We captured female *S. undulatus* from six sites in southern Alabama, USA from April to May 2017 (Supplemental Data S1) as part of larger experiment testing the effects of gestational stress on survival and reproduction (MacLeod et al. 2018). Fieldwork was conducted early in the breeding season (April-May) to maximize the likelihood that captured females were gravid for the first time that year, rather than producing their second brood. Gravidity was determined upon capture (monitored weekly thereafter) via abdominal palpation and scored on a scale from 0 to 4 (Graham et al. 2012). Lizards were housed separately in plastic tubs (46 × 40 × 30 cm) in a temperature-controlled room (21 ± 1°C). Tubs contained moist sand as a substrate, plastic perches, shelters and water bowls. Heat was provided by a 60-W incandescent light bulb suspended over one end of each tub for 8 hours a day to maintain a daytime temperature of approximately 32°C, with the cooler end of the tub maintaining a temperature of approximately 21°C, allowing lizards to behaviorally thermoregulate. Overhead lights were maintained on a 12-hour light-dark schedule. Food in the form of live crickets (*Acheta domestica*) sourced from a commercial reptile food vendor (ReptileFood.com, Dayton, OH), dusted twice weekly with calcium, vitamins and minerals (Herptivite and Ultrafine Calcium with Vitamin D; Repcal, Los Gatos, CA, USA) was provided every other day. Permits for lizard collections were approved by the Alabama Department of Conservation and Natural Resources. All animal protocols were approved by the Institutional Animal Care and Use Committees (IACUC) of the Pennsylvania State University (protocol no. 44595).

### Fecal sample collection

Once per week all traces of feces were removed from lizard housing tubs. Tubs were subsequently checked approximately every 4 hours during the day for signs of fresh fecal matter, with a maximum period of 12 hours overnight between checks. All collected fecal samples were therefore < 12 hours old. Feces were removed from tubs using long tweezers (wiped down with 80% ethanol before each use), stored in 1.5 mL centrifuge tubes, and immediately frozen at -20°C.

## DNA extraction and amplification

We isolated DNA from fecal samples using the Qiagen PowerFecal DNA Kit (Qiagen, Hilden, Germany; product number: 12830) with an overnight incubation in lysis buffer at 65°C to increase extraction yields (Trevelline et al. 2018). We also extracted DNA from moist sand (prior to contact with housing or animals) as a control for possible bacterial DNA present in the lizards' captive environment. Further, we also conducted four 'blank' extractions to correct for contaminants found in DNA extraction kits (Salter et al. 2014). We used polymerase chain reaction (PCR) to amplify a portion of the bacterial 16S rRNA gene for Illumina sequencing using the primers 515F and 806R (modified from the primer set employed by the Earth Microbiome Project (GTGCCAGCMGCCGCGGTAA and GGACTACNVGGGTWTCTAAT) targeting the V4 region of microbial small subunit ribosomal RNA gene (Caporaso et al. 2011). All primers contained 5' common sequence tags (known as common sequence 1 and 2, CS1 (ACACTGACGACATGGTTCTACA) and CS2 (TACGGTAGCAGAGACTTGGTCT) as described previously (Moonsamy et al. 2013), with forward primers containing the CS1 linker and reverse primers containing the CS2 linker. Amplicons were generated using a two-stage targeted amplicon sequencing protocol (Bybee et al. 2011; Green, Venkatramanan and Naqib 2015). First-stage PCR amplifications of 16S rRNA gene fragments were performed in 10 µL reactions in 96-well plates, using the MyTaq HS 2X mastermix (Bioline, London, UK; product number: 25045) and the following thermalcycling conditions: 95°C for 5 minutes, followed by 28 cycles of 95°C for 30 seconds, 55°C for 45 seconds and 72°C for 30 seconds.

Subsequently, a second PCR amplification was performed in 20 µL reactions in 96-well plates using the MyTaq HS 2X mastermix. Each well received a separate primer pair with a unique 10-base barcode, obtained from the Access Array Barcode Library for Illumina (Fluidigm, South San Francisco, CA; product number: 100-4876). These AccessArray primers contain the CS1 and CS2 linkers at the 3' ends of the oligonucleotides and can be used without any specific Fluidigm equipment. Thermalcycling conditions were as follows: 95°C for 5 minutes, followed by 8 cycles of 95°C for 30 seconds, 60°C for 30 seconds, and 72°C for 30 seconds. A final, 7-minute elongation step was performed at 72°C.

## Amplicon library preparation and Illumina sequencing

Amplified products were pooled in equal volume using an EpMotion5075 liquid handling robot (Eppendorf, Hamburg, Germany). The pooled library was purified using an AMPure XP cleanup protocol (0.6X, vol/vol; Agencourt, Beckmann-Coulter) to remove fragments smaller than 300 bp. The pooled libraries, with 20% phiX, were loaded onto an Illumina MiniSeq mid-output flow cell (2 × 153 base paired-end reads). Based on the distribution of reads per barcode, the amplicons were re-pooled to generate a more balanced distribution of reads. The re-pooled library was purified using AMPure XP cleanup, as described above. The re-pooled bacterial libraries were loaded onto a second MiniSeq flow cell and sequenced (2 × 153 base paired-end reads). In all cases, Fluidigm sequencing primers, targeting the CS1 and CS2 linker regions, were used to initiate sequencing. Data from the two runs were concatenated before analysis. All library preparation, pooling, and sequencing was performed at the DNA Services facility at the University of Illinois—Chicago. Sequence reads have been deposited in the NCBI SRA database under PRJNA491710.

## Illumina sequencing and bioinformatics

We sequenced bacterial 16S rRNA amplicons from a total of 82 fecal samples from gravid (n = 51 samples from 16 individuals) and non-gravid (n = 31 samples from 8 individuals) female eastern fence lizards, plus an additional 4 environmental contamination controls (sand substrate) and 4 DNA extraction kit controls. Sequence reads were filtered and processed using the DADA2 pipeline (Callahan et al. 2016) in QIIME2 version 2018.8 (Bolyen et al. 2018). We identified bacterial 16S rRNA sequence variants (hereafter Amplicon Sequence Variants or ASVs) using the Greengenes reference database (version 13.8; DeSantis et al. 2006). Illumina sequencing generated a total of 4.53 million reads (mean of 50 327 per sample) and 2395 ASVs after DADA2 processing. These sequences were further processed by removing non-bacterial (archaea, chloroplasts, and mitochondria) and contaminant ASVs (those detected in sand and DNA extraction kit controls), reducing our total number of reads to 3.31 million (mean of 40 311 per sample) and 1865 ASVs. We rarefied ASV tables to 2100 sequences per sample before comparisons of alpha (ASV richness, evenness, Faith's phylogenetic diversity, and Shannon Index) and beta diversity (unweighted and weighted UniFrac; Lozupone and Knight 2005) in QIIME2 (Bolyen et al. 2018).

## Statistical Analyses

In order to control for the well-documented effects of captivity on the gut microbiome of lizards (e.g. Kohl, Skopec and Dearing 2014; Kohl et al. 2017), we investigated for changes in alpha diversity among non-gravid females in response to number of days in captivity using linear mixed effect regression models (LMM) with individual as a random effect. Further, we investigated whether lizards exhibited broad- and/or fine-scale changes in microbial communities in response to time in captivity using phylum- and genus-level relative abundance values, respectively. Here, relative abundances were normalized using the variance stabilizing transformation of  $\arcsin(\text{abundance}^{0.5})$  (Shchepkova, Nagaraja and Kumar 2010; Kumar et al. 2012). Then, we compared the relative abundances of bacterial phyla and genera over time in captivity using the Response Screening function with the Robust Fit option to conduct multiple regressions using time in captivity as the main variable, and individual ID as a random variable. All statistical tests, including Benjamini-Hochberg False Discovery Rate (FDR) P-value corrections (Benjamini and Hochberg 1995), were conducted in JMP®, version 12.0 (SAS Institute Inc., Cary, NC). For all statistical analyses, P-values ≤ 0.05 were defined as 'significant', while P-values between 0.05-1.0 were defined as 'trends'.

We binned fecal samples occurring during *S. undulatus* gestation (~60 days) into either mid-stage (19-39 days before laying; n = 14 fecal samples) or late-stage (<19 days before laying; n = 37 fecal samples; Supplemental Data S1). We investigated differences in measures of alpha diversity—richness (total number of ASVs), Shannon Index (Shannon 1948), evenness (a component of the Shannon Index) and Faith's phylogenetic diversity (Faith 1992)—between gestation bins using an analysis of variance (ANOVA) with random effects (to account for multiple samples from the same individual). Additionally, we investigated for changes in alpha diversity metrics over the course of gestation with days before laying as a continuous variable using linear mixed models with individual as a random effect. All investigations of changes in alpha diversity, including FDR-corrections for multiple comparisons, were conducted in JMP® 12.0. For

metrics of beta diversity, we tested for differences in unweighted (community membership) and weighted (community structure) UniFrac distances (Lozupone and Knight 2005) across gestation stages. Differences in microbial beta diversity were visualized by conducting Principal Coordinate Analysis (PCoA) (Lozupone and Knight 2005). Using distance matrices, we conducted a permutational multivariate analysis of variance (PERMANOVA; Anderson 2001) with random effects (to account for fecal samples collected from the same individual) in PRIMER with PERMANOVA+ version 7.0.13.

To compare inter-individual variability in beta diversity (unweighted and weighted UniFrac) between gestational stages, we calculated the pairwise distances between each sample in a gestation stage to all other samples in the same gestation stage. These distances were then averaged to become the average pairwise distance for each sample. Thus, each sample only had one average pairwise distance, in order to avoid pseudoreplication. Average pairwise distances were compared across gestational stages (non-gravid, mid, and late) using an ANOVA and differences between stages were tested using a post-hoc Tukey's HSD test in JMP® 12.0. Additionally, changes in the relative abundances of microbial phyla and genera were investigated using days before laying (continuous) and gestational stage (categorical) as the main variables, and individual as a random effect. Again, these P-values were FDR-corrected in JMP® 12.0 using the Response Screening function.

## RESULTS

### Effects of captivity

Using only non-gravid female control lizards, we first investigated for effects of captivity on the gut microbiota, as this has been demonstrated in numerous animals, including lizards (Kohl, Skopec and Dearing 2014; Kohl et al. 2017). We collected repeated samples from non-gravid females over 54 days in captivity. Alpha diversity of gut microbial communities (ASV richness, evenness, Faith's phylogenetic diversity and Shannon Index) did not change as an effect of time in captivity (LMM,  $P > 0.2$  for all metrics; Fig. S1, Supporting Information). At the phylum level, we found that the relative abundance of *Tenericutes* in the guts of non-gravid individuals decreased significantly as an effect of time in captivity (LMM, FDR-corrected  $P = 0.008$ ). At the genus level, we observed a significant increase in the abundance of *Phascolarctobacterium* (phylum Firmicutes) in response to time in captivity (LMM, FDR-corrected  $P = 0.0004$ ). Notably, *Phascolarctobacterium* was only detected in 12% of samples during the first 45 days in captivity (3 of 24 samples). However, after 45 days in captivity, this genus was present in 100% of samples ( $n = 7$ ), with a mean relative abundance of  $0.12 \pm 0.01\%$  SE.

### Effects of gestation

We binned fecal samples into either mid- or late-gestation (*S. undulatus* gestation is roughly 60 days) to compare gut microbial communities of non-gravid females to those in mid- (19–39 days before laying;  $n = 14$ ) and late-gestational stages (<19 days before laying;  $n = 37$ ). We did not collect any samples from females in early gestation (>39 days before laying). When binned by these 'gestation stages', we observed that lizards in late gestation exhibited significantly lower ASV richness (Fig. 1A; ANOVA,  $F_{2,34.9} = 6.75$ ,  $P = 0.003$ ), Shannon diversity (Fig. 1C; ANOVA,  $F_{2,32.9} = 3.83$ ,  $P = 0.032$ ) and a trend for lower measurements of Faith's phylogenetic diversity (Fig. 1D; ANOVA,  $F_{2,38.1} = 2.84$ ,

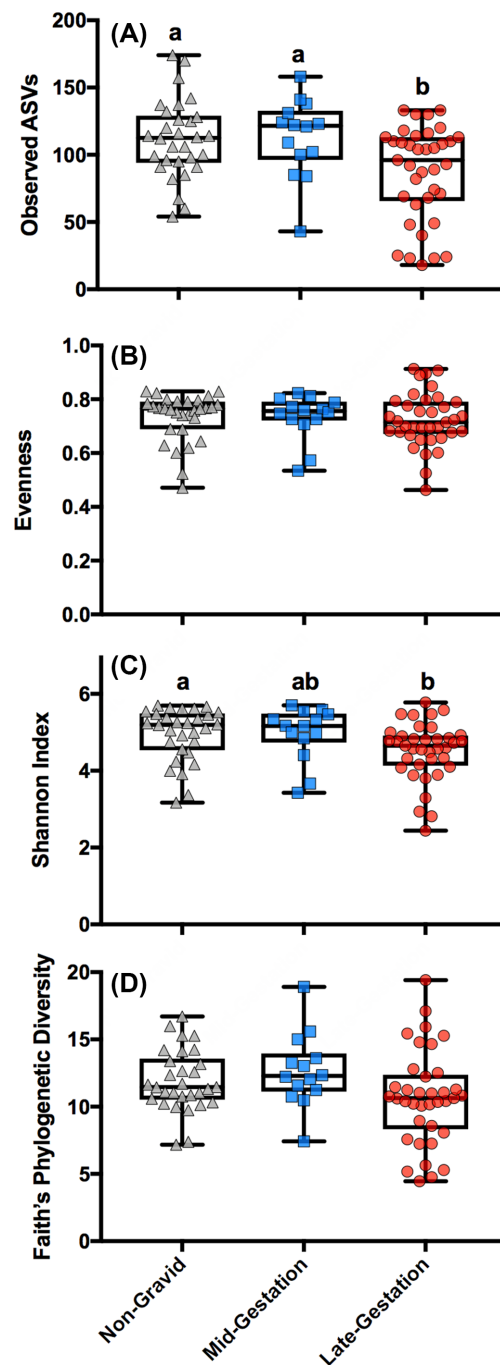

Figure 1. Differences in alpha diversity metrics over gestation stages. A) Observed ASVs; B) Evenness; C) Shannon Index and D) Faith's phylogenetic diversity. Box plots depict the median and interquartile range, with stems representing the maximum and minimum values. Box plots that do not share lower case letters above them are statistically significant from one another according to the Tukey's HSD test.

$P = 0.071$ ) compared to non-gravid females. Further, lizards in late gestation exhibited significantly lower ASV richness compared to females in the mid-gestation stage (Fig. 1A; ANOVA,  $P = 0.029$ ). There was no effect of gestation on community evenness (Fig. 1B; ANOVA,  $F_{2,30.2} = 0.25$ ,  $P = 0.78$ ). When investigating the relationship between alpha diversity and gestation as a continuous variable, there was a trend between ASV richness and the number of days before laying (LMM,  $R^2 = 0.41$ ,  $P = 0.051$ ), but



not for other measurements of alpha diversity. As an additional check, we tested whether the removal of ASVs detected in sand samples could be responsible for these results, but found no significant difference in the number of removed ASVs or sequences across gestation stages (Fig. S2, Supporting Information).

We found that microbial community membership (unweighted UniFrac distances) varied significantly as an effect of gestation stage (Fig. 2A; PERMANOVA, pseudo-F = 1.65,  $P = 0.004$ ). Specifically, non-pregnant females differed significantly from late-gestation individuals (PERMANOVA, pseudo-F = 1.27, FDR-corrected  $P = 0.046$ ). There was a trend for microbial community structure (weighted UniFrac distances) to differ across gestation stages, but no significant differences between gestation stages (Fig. 2B; PERMANOVA, pseudo-F = 1.45,  $P = 0.096$ ). When comparing the average pairwise distances between samples within a given gestation stage, we found significant differences in both community membership (Fig. 2C; ANOVA,  $F_{2,36.95} = 7.93$ ,  $P = 0.001$ ) and community structure (Fig. 2D; ANOVA,  $F_{2,36.02} = 5.72$ ,  $P = 0.007$ ). Specifically, individuals in late gestation exhibited significantly higher pairwise distances for both community membership (Fig. 2C; ANOVA,  $F_{1,17.15} = 9.40$ , FDR-corrected  $P = 0.023$ ) and community structure (Fig. 2D; ANOVA,  $F_{1,14.35} = 5.72$ , FDR-corrected  $P = 0.035$ ) compared to non-gravid females, indicating a higher degree of inter-individual variation. In contrast, there were no significant differences in pairwise distances between non-gravid and mid-gestation individuals for either community membership (Fig. 2C; ANOVA,  $F_{1,15.29} = 1.23$ , FDR-corrected  $P = 0.341$ ) or community structure (Fig. 2D; ANOVA,  $F_{1,11.71} = 0.11$ , FDR-corrected  $P = 0.742$ ).

No phyla ( $n = 12$ ) or genera ( $n = 47$ ) significantly changed in relative abundance in response to time since laying (continuous) or to gestation stages (categorical). However, we observed a trend in the relative abundance of the candidate phylum Melainabacteria to differ among gestation stages (Fig. 3; ANOVA,  $F_{2,42.15} = 9.98$ , FDR-corrected  $P = 0.08$ ). In general, individuals with a lower relative abundance of Melainabacteria in mid-gestation also had lower relative abundance values in late-gestation (Figure S3, Supporting Information). The prevalence of this phylum tended to decrease over the course of gestation, as it was detected in 65% of samples from non-gravid individuals, 71% of samples from mid-gestation individuals, but only 38% of samples from individuals in late gestation.

## DISCUSSION

In this study, we investigated whether the gut microbiota of gravid lizards might exhibit qualitatively similar changes over gestation to those previously documented in humans and mice. As predicted, we observed changes in gut bacterial ASV richness and diversity over the course of lizard gestation. Further, we observed increased inter-individual variation in gut bacterial community membership and structure among females in late-gestational stages compared to non-gravid individuals. These changes accompanied reduced relative abundance of Melainabacteria in late-gestational individuals. Below we discuss the potential conserved mechanisms and consequences of these changes in placental mammals and lizards.

We found that gut microbial ASV richness decreased over the course of lizard gestation. This change in alpha diversity was not due to the effects of captivity, as evidenced by the stability of gut bacterial communities among non-gravid individuals over the course of this study. While gut bacterial richness may be associated with host survival (e.g. Bestion et al. 2017), an

outstanding question is how changes in alpha diversity specifically affect host physiology (Reese and Dunn 2018). For example, previous studies have shown that bacterial community richness is positively correlated with metabolic activity (Patsch et al. 2018) and that reduced alpha diversity is associated with phenotypes such as hyperglycemia and increased adiposity among pregnant women (Vijay-Kumar et al. 2010; Koren et al. 2012). At first glance, these changes in host physiology may appear harmful to a gestating host, but maintaining these metabolic phenotypes in late-gestational stages may increase the availability of nutrients beneficial to both the mother and offspring (Koren et al. 2012). Notably, hyperglycemia has also been observed in actively reproducing lizards (Chandavar and Naik 2012), suggesting that changes in the gut microbiota over gestation may provide benefits similar to those predicted in humans. Alternatively, shifts in gut microbial communities may be byproducts of hormonal and immunological changes over the course of pregnancy (Koren et al. 2012; Nuriel-Ohayon, Neuman and Koren 2016; Elderman et al. 2018), and thus may not provide any specific adaptive benefit.

Inter-individual variation in gut bacterial community membership and structure increased for lizards in late-gestational stages compared to non-gravid females. In pregnant women, inter-individual variation has also been shown to increase over the course of gestation (Koren et al. 2012). It is thought that greater inter-individual variation could be induced by hormonal or immunological changes in the late stages of pregnancy (Koren et al. 2012; Nuriel-Ohayon, Neuman and Koren 2016; Elderman et al. 2018). Regardless of the mechanisms involved in this phenomenon, greater inter-individual variation in could represent a loss of host control over gut microbial community assembly and a stronger overall influence of neutral processes. Given that offspring are thought to inherit microbes from their mothers (Funkhouser and Bordenstein 2013), such late-gestational changes in lizard gut microbiota may influence the incipient microbial communities of offspring. Such effects to transmission dynamics may affect long-term host health, as several studies have found that the early microbiome is critical for proper development and immunity (Arrieta et al. 2014; Tamburini et al. 2016). While the mechanisms of mother-offspring bacterial transmission are not well understood in wildlife, evidence from human medicine has demonstrated that fetuses may acquire their pioneer microbiota *in utero* (Perez-Muñoz et al. 2017) and through post-natal transmission (Mueller et al. 2017). Further, recent research has shown that *S. undulatus* may transmit maternal microbiota *in ovo* (Trevelline et al. 2018). Together, these studies suggest that maternal microbiota may provide lizard offspring with their incipient gut microbial communities, though it is unknown whether bacteria can be transmitted to a fully-formed egg in late-gestational stages. Regardless, depending on whether inter-individual variation in beta diversity is stochastic, changes in gut bacterial communities could affect which microbial taxa are transmitted to offspring.

We found that lizards in late-stage gestation tended to have a lower relative abundance and reduced prevalence of the bacterial phylum Melainabacteria compared to non-gravid individuals. A similar phenomenon has been observed in humans, where pregnant women exhibit increased relative abundance of Actinobacteria and Proteobacteria over pregnancy (Koren et al. 2012), suggesting that lineage-specific interactions may be necessary to meet the specific needs of the host during gestation. Importantly, we did not observe reduced relative abundance of Melainabacteria as an effect of captivity in non-gravid individuals. Melainabacteria (a candidate phylum closely related to Cyanobacteria) is thought to increase the availability of several

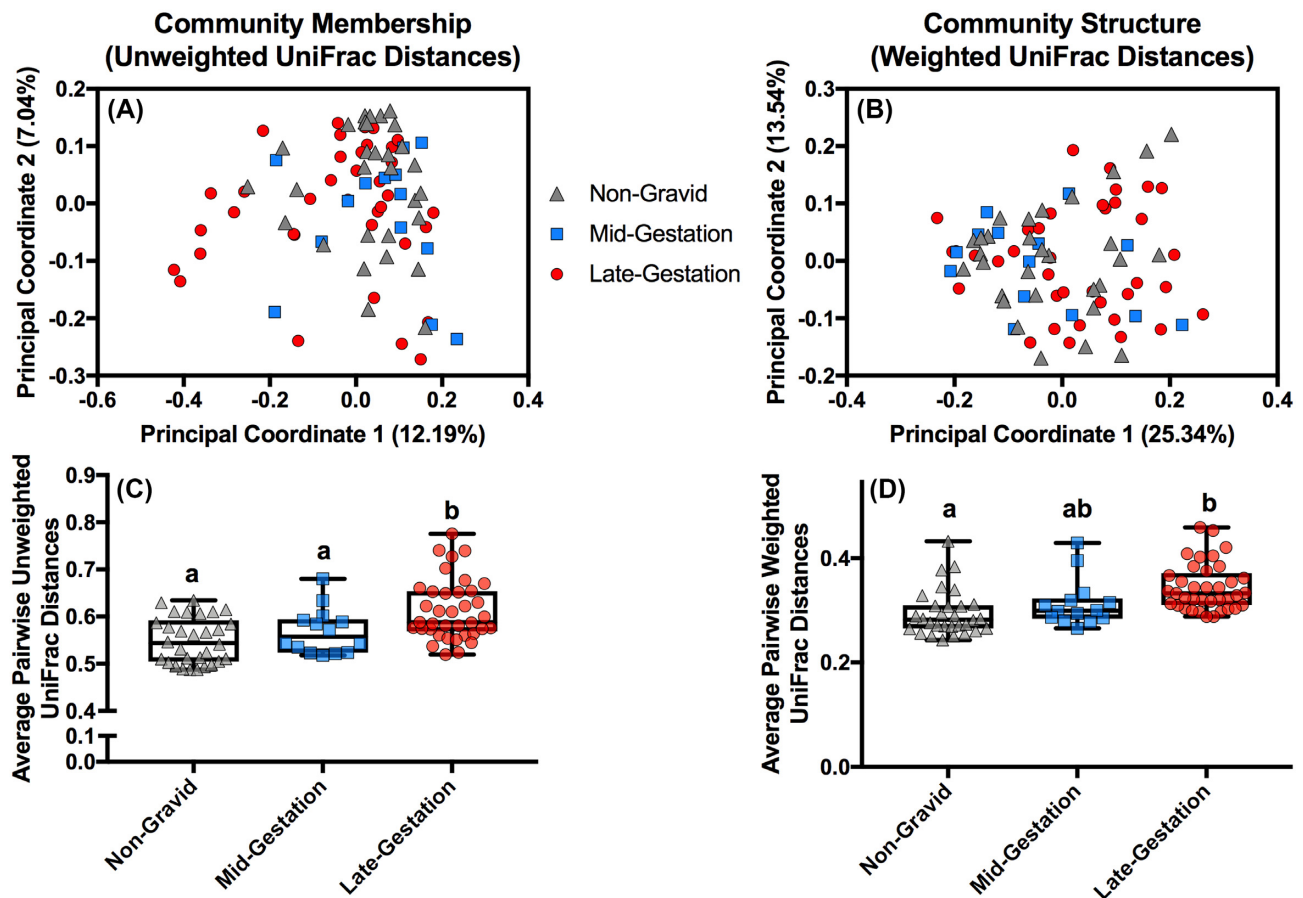

Figure 2. Changes in microbial community membership and structure over gestation. A) Principal coordinate analysis of unweighted UniFrac distances (community membership). B) Principal coordinate analysis of weighted UniFrac distances (community structure). Points are colored according to their gestation stage. C) Pairwise unweighted UniFrac distances between samples within a gestation stage. D) Pairwise weighted UniFrac distances between samples within a gestation stage. Box plots depict the median and interquartile range, with stems representing the maximum and minimum values. Box plots that do not share lower case letters above them are statistically significant from one another according to the Tukey's HSD test.

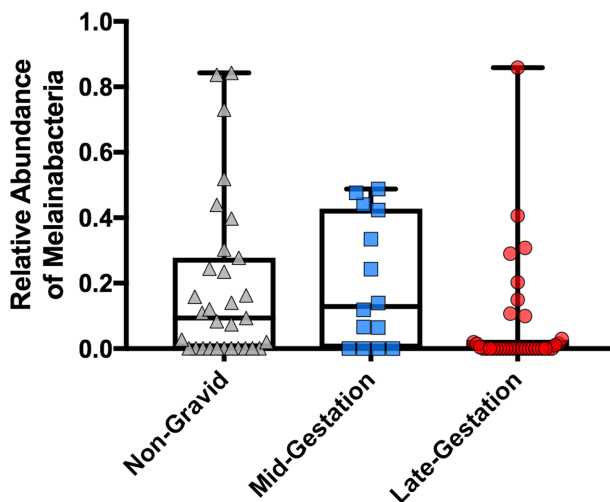

Figure 3. Relative abundance of Melainabacteria in samples from different gestational stages. Box plots depict the median and interquartile range, with stems representing the maximum and minimum values.

vitamins in the gut (Di Rienzi et al. 2013), some of which could benefit the host reproduction, especially during early phases of gestation when maternal contributions of nutrients to the

unshelled egg are still possible. However, it is worth noting that the reduced relative abundance of Melainabacteria could be caused by hormonal or immunological changes over the course of gestation (Koren et al. 2012; Nuriel-Ohayon, Neuman and Koren 2016; Elderman et al. 2018), and thus these potential adaptive benefits are highly speculative in nature.

Here, we demonstrated that the gut microbiota of an oviparous lizard changes over the course of gestation, mirroring previous studies on human pregnancy. It is possible that this phenomenon is conserved among vertebrates, with the physiological challenge of reproduction driving changes in the gut microbiota across vertebrate lineages. However, vertebrates as a group exhibit a diversity of reproductive strategies, which may differ in the energetic costs they impose. Therefore, future work should aim to determine whether decreased gut microbial community richness and diversity is universal across reproductive strategies, and what the underlying mechanisms contribute to these changes (e.g. increased energy costs, hormonal signals, restructuring of the immune system). Another major question is whether the observed changes in gut bacterial communities recover after egg laying. In humans, changes in maternal gut bacterial communities persist for at least one month postpartum (Koren et al. 2012). While we did not investigate this phenomenon in our study, it is possible gestation-induced changes in lizard gut microbiota may persist long after egg laying,

possibly influencing subsequent broods. Overall, examining the generality of these changes across vertebrate lineages will expand our understanding of host-microbe interactions in an evolutionary context, and allow us to better understand the functional role of the gut microbiome during reproduction.

## SUPPLEMENTARY DATA

Supplementary data are available at [FEMSEC](#) online.

## ACKNOWLEDGEMENTS

We thank the Solon Dixon Forestry Education Center and Land Between the Lakes National Recreation Area for the use of their facilities. David Ensminger and Cameron Venable assisted with wild lizard collection. Dustin Owen, Heather Engler, Thomas Adams and Jennifer Heppner assisted with lizard egg and environmental sample collection. We thank Dr. Stefan Green and the DNA Services Facility of University of Illinois—Chicago for conducting Illumina sequencing. The authors have no conflicts of interest to declare.

## FUNDING

This project was funded by NSF grant 1456655.

**Conflicts of interest.** None declared.

## REFERENCES

- de Agüero MG, Ganai-Vonarburg SC, Fuhrer T et al. The maternal microbiota drives early postnatal innate immune development. *Science* 2016;**351**:1296–302.
- Anderson MJ. A new method for non-parametric multivariate analysis of variance. *Austral Ecology* 2001;**26**:32–46.
- Angilletta M, Sears M. The metabolic cost of reproduction in an oviparous lizard. *Funct Ecol* 2000;**14**:39–45.
- Arrieta M-C, Stiemsma LT, Amenyogbe N et al. The intestinal microbiome in early life: health and disease. *Frontiers in Immunology* 2014;**5**: 427.
- Bäckhed F, Ley RE, Sonnenburg JL et al. Host-bacterial mutualism in the human intestine. *Science* 2005;**307**: 1915–20.
- Benjamini Y, Hochberg Y. Controlling the false discovery rate: a practical and powerful approach to multiple testing. *J Royal Stat Soc Ser B (Methodological)* 1995;**57**:289–300.
- Bestion E, Jacob S, Zinger L et al. Climate warming reduces gut microbiota diversity in a vertebrate ectotherm. *Nat Ecol Evol* 2017;**1**:0161.
- Bolyen E, Rideout JR, Dillon MR et al. QIIME 2: Reproducible, interactive, scalable, and extensible microbiome data science. *PeerJ Preprints* 2018; e27295v1.
- Bybee SM, Bracken-Grissom H, Haynes BD et al. Targeted amplicon sequencing (TAS): a scalable next-gen approach to multilocus, multitaxa phylogenetics. *Genome Biol Evol* 2011;**3**:1312–23.
- Callahan BJ, McMurdie PJ, Rosen MJ et al. High-resolution sample inference from Illumina amplicon data. *Nat Methods* 2016;**13**:581–3.
- Caporaso JG, Lauber CL, Walters WA et al. Global patterns of 16S rRNA diversity at a depth of millions of sequences per sample. *Proc Natl Acad Sci* 2011;**108**:4516–22.
- Chandavar V, Naik P. The endocrine pancreas of the lizard *Calotes versicolor*: an immunocytochemical and physiological study with respect to its reproductive cycle. *J Cytol Histol* 2012;**3**:143.
- Collado MC, Isolauri E, Laitinen K et al. Distinct composition of gut microbiota during pregnancy in overweight and normal-weight women. *Am J Clin Nutr* 2008;**88**:894–9.
- DeSantis TZ, Hugenholtz P, Larsen N et al. Greengenes, a chimera-checked 16S rRNA gene database and workbench compatible with ARB. *Appl Environ Microbiol* 2006;**72**:5069–72.
- Di Rienzi SC, Sharon I, Wrighton KC et al. The human gut and groundwater harbor non-photosynthetic bacteria belonging to a new candidate phylum sibling to Cyanobacteria. *Elife* 2013;**2**:e01102.
- Elderman M, Hugenholtz F, Belzer C et al. Changes in intestinal gene expression and microbiota composition during late pregnancy are mouse strain dependent. *Sci Rep* 2018;**8**:10001.
- Faith DP. Conservation evaluation and phylogenetic diversity. *Biol Conserv* 1992;**61**:1–10.
- French SS, Moore MC. Immune function varies with reproductive stage and context in female and male tree lizards, *Urosaurus ornatus*. *General and Comparative Endocrinology* 2008;**155**:148–56.
- Funkhouser LJ, Bordenstein SR. Mom knows best: the universality of maternal microbial transmission. *PLoS Biol* 2013;**11**:e1001631.
- Graham SP, Freidenfelds NA, McCormick GL et al. The impacts of invaders: basal and acute stress glucocorticoid profiles and immune function in native lizards threatened by invasive ants. *Gen Comp Endocrinol* 2012;**176**:400–8.
- Green SJ, Venkatramanan R, Naqib A. Deconstructing the polymerase chain reaction: understanding and correcting bias associated with primer degeneracies and primer-template mismatches. *PLoS One* 2015;**10**:e0128122.
- Kohl KD, Brun A, Magallanes M et al. Gut microbial ecology of lizards: insights into diversity in the wild, effects of captivity, variation across gut regions and transmission. *Mol Ecol* 2017;**26**:1175–89.
- Kohl KD, Carey HV. A place for host-microbe symbiosis in the comparative physiologist's toolbox. *J Exp Biol* 2016;**219**:3496–504.
- Kohl KD, Skopek MM, Dearing MD. Captivity results in disparate loss of gut microbial diversity in closely related hosts. *Conservation Physiology* 2014;**2**:cou009.
- Koren O, Goodrich JK, Cullender TC et al. Host remodeling of the gut microbiome and metabolic changes during pregnancy. *Cell* 2012;**150**:470–80.
- Kumar PS, Mason MR, Brooker MR et al. Pyrosequencing reveals unique microbial signatures associated with healthy and failing dental implants. *J Clin Periodontol* 2012;**39**:425–33.
- Lof M, Olausson H, Bostrom K et al. Changes in basal metabolic rate during pregnancy in relation to changes in body weight and composition, cardiac output, insulin-like growth factor I, and thyroid hormones and in relation to fetal growth. *Am J Clin Nutr* 2005;**81**:678–85.
- Lozupone C, Knight R. UniFrac: a new phylogenetic method for comparing microbial communities. *Appl Environ Microbiol* 2005;**71**:8228–35.
- MacLeod K, Sheriff MJ, Ensminger D et al. Survival and reproductive costs of repeated acute glucocorticoid elevations in a captive, wild animal. *Gen Comp Endocrinol* 2018;**268**:1–6.
- Mallott EK, Amato KR. The microbial reproductive ecology of white-faced capuchins (*Cebus capucinus*). *Am J Primatol* 2018;**80**:e22896.

- McFall-Ngai M, Hadfield MG, Bosch TC *et al.* Animals in a bacterial world, a new imperative for the life sciences. *Proc Natl Acad Sci* 2013;**110**:3229–36.
- Moonsamy P, Williams T, Bonella P *et al.* High throughput HLA genotyping using 454 sequencing and the Fluidigm Access Array™ system for simplified amplicon library preparation. *Tissue Antigens* 2013;**81**:141–9.
- Mueller NT, Shin H, Pizoni A *et al.* Delivery mode and the transition of pioneering gut-microbiota structure, composition and predicted metabolic function. *Genes* 2017;**8**:364.
- Nuriel-Ohayon M, Neuman H, Koren O. Microbial changes during pregnancy, birth, and infancy. *Frontiers in microbiology* 2016;**7**:1031.
- Patsch D, van Vliet S, Marcantini LG *et al.* Generality of associations between biological richness and the rates of metabolic processes across microbial communities. *Environ Microbiol* 2018;**20**:4356–68.
- Perez-Muñoz ME, Arrieta MC, Ramer-Tait AE *et al.* A critical assessment of the “sterile womb” and “in utero colonization” hypotheses: implications for research on the pioneer infant microbiome. *Microbiome* 2017;**5**:48.
- Phillips CD, Phelan G, Dowd SE *et al.* Microbiome analysis among bats describes influences of host phylogeny, life history, physiology and geography. *Mol Ecol* 2012;**21**:2617–27.
- Reese AT, Dunn RR. Drivers of microbiome biodiversity: a review of general rules, feces, and ignorance. *mBio* 2018;**9**:e01294–18.
- Ruiz M, Wang D, Reinke BA *et al.* Trade-offs between reproductive coloration and innate immunity in a natural population of female sagebrush lizards, *Sceloporus graciosus* *The Herpetological Journal* 2011;**21**:131–4.
- Sacks G, Sargent I, Redman C. An innate view of human pregnancy. *Immunol Today* 1999;**20**:114–8.
- Salter SJ, Cox MJ, Turek EM *et al.* Reagent and laboratory contamination can critically impact sequence-based microbiome analyses. *BMC Biol* 2014;**12**:87.
- Shannon CE. A mathematical theory of communication. *Bell Syst Tech J* 1948;**27**:379–423.
- Shchipkova A, Nagaraja H, Kumar P. Subgingival microbial profiles of smokers with periodontitis. *J Dent Res* 2010;**89**:1247–53.
- Tamburini S, Shen N, Wu HC *et al.* The microbiome in early life: implications for health outcomes. *Nat Med* 2016;**22**:713.
- Trevelline BK, MacLeod KJ, Knutie SA *et al.* In ovo microbial communities: a potential mechanism for the initial acquisition of gut microbiota among oviparous birds and lizards. *Biol Lett* 2018;**14**: 20180225.
- Vijay-Kumar M, Aitken JD, Carvalho FA *et al.* Metabolic syndrome and altered gut microbiota in mice lacking Toll-like receptor 5. *Science* 2010;**328**:228–31.
